# Supplementary material
Source: bioRxiv or medRxiv preprint supplement (https://medrxiv.org/highwire/filestream/78449/field_highwire_adjunct_files/0/2020.04.25.20079509-1.pdf)
Supplement: Supplementary file [file 2020.04.25.20079509-1.pdf]

## SUPPLEMENTAL MATERIAL

**Table S1. Description of cases of pregnant women with a diagnose of COVID-19.**

| Case | Reference                | Data collection period | Age | Pregnancy complications  | Type of delivery | C-section indication                             | Gestational age at birth | Pregnancy outcome | Admission to Intensive Care Unit       | Birth Weight (g) | Apgar (1,5 min) | Neonatal complications                                                                                                         | Intrauterine/ Neonatal Samples collected                                   | Intrauterine/ Neonatal SARS-CoV-2 infection | Neonatal death |
|------|--------------------------|------------------------|-----|--------------------------|------------------|--------------------------------------------------|--------------------------|-------------------|----------------------------------------|------------------|-----------------|--------------------------------------------------------------------------------------------------------------------------------|----------------------------------------------------------------------------|---------------------------------------------|----------------|
| 1    | Chen et al. <sup>5</sup> | 20 - 25 Jan, 2020      | 33  | Influenza                | Cesarean         | Severely elevated ALT or AST; COVID-19 pneumonia | 37 <sup>+2</sup>         | Live birth        | NI (no need of mechanical ventilation) | 2870             | (8,9)           | Mild increase in myocardial enzymes on the day of birth and creatine kinase-myocardial band, but without any clinical symptoms | Not tested                                                                 | Not tested                                  | No             |
| 2    | Chen et al. <sup>5</sup> |                        | 27  | None                     | Cesarean         | COVID-19 pneumonia                               | 38 <sup>+3</sup>         | Live birth        | NI (no need of mechanical ventilation) | 3730             | (9,10)          | None                                                                                                                           | Amniotic fluid, cord blood, breast milk, and newborn's throat swab samples | Negative                                    | No             |
| 3    | Chen et al. <sup>5</sup> |                        | 40  | Gestational hypertension | Cesarean         | Two previous cesareans; COVID-19 pneumonia       | 36 <sup>+0</sup>         | Live birth        | NI (no need of mechanical ventilation) | 3820             | (9,10)          | None                                                                                                                           | Not tested                                                                 | Not tested                                  | No             |

|   |                  |  |    |                |          |                                                  |                  |            |                                        |      |        |      |                                                                            |            |    |
|---|------------------|--|----|----------------|----------|--------------------------------------------------|------------------|------------|----------------------------------------|------|--------|------|----------------------------------------------------------------------------|------------|----|
| 4 | Chen et al.<br>5 |  | 26 | Pre-eclampsia  | Cesarean | Preeclampsia; Fetal distress; COVID-19 pneumonia | 36 <sup>+2</sup> | Live birth | NI (no need of mechanical ventilation) | 1880 | (8,9)  | SGA  | Amniotic fluid, cord blood, breast milk, and newborn's throat swab samples | Negative   | No |
| 5 | Chen et al.<br>5 |  | 26 | Fetal distress | Cesarean | Fetal distress; COVID-19 pneumonia               | 38 <sup>+1</sup> | Live birth | NI (no need of mechanical ventilation) | 2970 | (9,10) | None | Amniotic fluid, cord blood, breast milk, and newborn's throat swab samples | Negative   | No |
| 6 | Chen et al.<br>5 |  | 26 | None           | Cesarean | Two previous stillbirths; COVID-19 pneumonia     | 36 <sup>+3</sup> | Live birth | NI (no need of mechanical ventilation) | 3040 | (9,10) | None | Amniotic fluid, cord blood, breast milk, and newborn's throat swab samples | Negative   | No |
| 7 | Chen et al.<br>5 |  | 29 | PROM           | Cesarean | PROM; COVID-19 pneumonia                         | 36 <sup>+2</sup> | Live birth | NI (no need of mechanical ventilation) | 2460 | (9,10) | None | Not tested                                                                 | Not tested | No |
| 8 | Chen et al.<br>5 |  | 28 | Fetal distress | Cesarean | Fetal distress; COVID-19 pneumonia               | 38 <sup>+0</sup> | Live birth | NI (no need of mechanical ventilation) | 2800 | (9,10) | None | Amniotic fluid, cord blood, breast milk, and newborn's throat swab samples | Negative   | No |
| 9 | Chen et al.<br>5 |  | 34 | PROM           | Cesarean | PROM; COVID-19 pneumonia                         | 39 <sup>+4</sup> | Live birth | NI (no need of mechanical ventilation) | 3530 | (8,10) | None | Amniotic fluid, cord blood, breast milk, and newborn's throat swab samples | Negative   | No |

|           |                                       |                         |    |                                                                        |          |    |                  |            |    |      |        |                                                                                                                                                        |                                                                        |          |     |
|-----------|---------------------------------------|-------------------------|----|------------------------------------------------------------------------|----------|----|------------------|------------|----|------|--------|--------------------------------------------------------------------------------------------------------------------------------------------------------|------------------------------------------------------------------------|----------|-----|
| <b>10</b> | Zhu et al.<br>18,<br>Luo et al.<br>62 | 20 Jan - 5<br>Feb, 2020 | 25 | Fetal<br>distress,<br>oligohydra<br>mnios                              | Cesarean | NI | 38 <sup>+4</sup> | Live birth | NI | 2450 | (9,10) | SGA,<br>vomiting,<br>feeding<br>intolerance<br>and mild<br>bloating                                                                                    | Placenta,<br>newborn's<br>throat swab<br>sample (day 3<br>after birth) | Negative | No  |
| <b>11</b> | Zhu et al.<br>18,<br>Luo et al.<br>62 |                         | 35 | Scarred<br>uterus,<br>PROM                                             | Cesarean | NI | 33 <sup>+6</sup> | Live birth | NI | 2050 | (9,10) | Shortness of<br>breath                                                                                                                                 | Placenta,<br>newborn's<br>throat swab<br>sample (day 1<br>after birth) | Negative | No  |
| <b>12</b> | Zhu et al.<br>18,<br>Luo et al.<br>62 |                         | 35 | Fetal<br>distress,<br>PROM                                             | Vaginal  | NA | 34 <sup>+2</sup> | Live birth | NI | 2350 | (8,10) | Shortness of<br>breath                                                                                                                                 | Placenta,<br>newborn's<br>throat swab<br>sample (day 1<br>after birth) | Negative | No  |
| <b>13</b> | Zhu et al.<br>18,<br>Luo et al.<br>62 |                         | 30 | Fetal<br>distress,<br>vaginal<br>bleeding in<br>the third<br>trimester | Cesarean | NI | 34 <sup>+5</sup> | Live birth | NI | 2200 | (8,8)  | Increased<br>heart rate,<br>refractory<br>shock, gastric<br>bleeding,<br>multiple organ<br>failure and<br>disseminated<br>intravascular<br>coagulation | Placenta,<br>newborn's<br>throat swab<br>sample (day 9<br>after birth) | Negative | Yes |
| <b>14</b> | Zhu et al.<br>18,<br>Luo et al.<br>62 |                         | 30 | Cholecystiti<br>s and fever                                            | Cesarean | NI | 39 <sup>+0</sup> | Live birth | NI | 3030 | (8,9)  | Diffusely<br>scattered<br>rashes<br>throughout the<br>body, edema<br>and facial skin<br>lesions                                                        | Placenta                                                               | Negative | No  |

|           |                                                                                                                 |                           |    |                                                 |          |    |                  |                  |    |               |                   |                                                                                                   |                                                                                                      |                                                                                        |             |
|-----------|-----------------------------------------------------------------------------------------------------------------|---------------------------|----|-------------------------------------------------|----------|----|------------------|------------------|----|---------------|-------------------|---------------------------------------------------------------------------------------------------|------------------------------------------------------------------------------------------------------|----------------------------------------------------------------------------------------|-------------|
| <b>15</b> | Zhu et al. <sup>18,</sup><br>Luo et al. <sup>62</sup>                                                           |                           | 30 | Fetal distress, placenta previa, Polyhydramnios | Cesarean | NI | 37 <sup>+0</sup> | Live birth       | NI | 3800          | (7,8)             | LGA                                                                                               | Placenta, newborn's throat swab sample (day 1 after birth)                                           | Negative                                                                               | In hospital |
| <b>16</b> | Zhu et al. <sup>18,</sup><br>Luo et al. <sup>62</sup>                                                           |                           | 30 | Fetal distress                                  | Cesarean | NI | 34 <sup>+6</sup> | Live birth       | NI | 2300          | (9,10)            | Shortness of breath, fever, gastrointestinal hemorrhage, disseminated intravascular coagulation   | Placenta, newborn's throat swab sample (day 7 after birth)                                           | Negative                                                                               | No          |
| <b>17</b> | Zhu et al. <sup>18,</sup><br>Luo et al. <sup>62</sup>                                                           |                           | 29 | Twin pregnancy, fetal distress, PROM            | Vaginal  | NA | 31 <sup>+0</sup> | Live birth (n=2) | NI | 1520/<br>1720 | (9,10),<br>(9,10) | Shortness of breath, cyanosis                                                                     | Placenta, newborn's throat swab sample (day 1 after birth)                                           | Negative                                                                               | In hospital |
| <b>18</b> | Zhu et al. <sup>18,</sup><br>Luo et al. <sup>62</sup>                                                           |                           | 34 | None                                            | Cesarean | NI | 39 <sup>+0</sup> | Live birth       | NI | 2810          | (10,10)           | SGA, moaning, shortness of breath, cyanosis, fever, tachypnoea, cyanosis, fever and refusing milk | Placenta, newborn's throat swab sample (day 1 after birth)                                           | Negative                                                                               | In hospital |
| <b>19</b> | Yu et al. <sup>24,</sup><br>Liu et al. <sup>25,</sup><br>Luo et al. <sup>62,</sup><br>Wang et al. <sup>21</sup> | 1 Jan -<br>8 Feb,<br>2020 | 34 | Hypothyroidism                                  | Cesarean | NI | 39 <sup>+6</sup> | Live birth       | No | 3250          | (8-9,<br>9-10)    | Mild shortness of breath symptoms. mild pulmonary infection on Chest x-ray                        | Placenta, cord blood, breast milk, newborn's throat swab (36h after birth) and two weeks after birth | Positive (neonatal throat swab 36 h after birth) and negatives (two weeks after birth) | No          |

|    |                                                                                     |                 |    |                           |          |                                                                  |                  |            |    |      |             |                                                    |                                                                     |                                               |                      |
|----|-------------------------------------------------------------------------------------|-----------------|----|---------------------------|----------|------------------------------------------------------------------|------------------|------------|----|------|-------------|----------------------------------------------------|---------------------------------------------------------------------|-----------------------------------------------|----------------------|
| 20 | Yu et al. <sup>24</sup> ;<br>Luo et al. <sup>62</sup>                               |                 | 30 | Polycystic ovary syndrome | Cesarean | NI                                                               | 38 <sup>+5</sup> | Live birth | No | 3350 | (8-9, 9-10) | None                                               | Not tested                                                          | Not tested                                    | Neonatal throat swab |
| 21 | Yu et al. <sup>24</sup> ;<br>Liu et al. <sup>25</sup> ;<br>Luo et al. <sup>62</sup> |                 | 31 | None                      | Cesarean | NI                                                               | 41 <sup>+2</sup> | Live birth | No | 3200 | (8-9, 9-10) | None                                               | Newborn's throat swab                                               | Negative                                      | Neonatal throat swab |
| 22 | Yu et al. <sup>24</sup> ;<br>Luo et al. <sup>62</sup>                               |                 | 33 | Uterine scar              | Cesarean | NI                                                               | 37 <sup>+0</sup> | Live birth | No | 3000 | (8-9, 9-10) | None                                               | Not tested                                                          | Not tested                                    | Neonatal throat swab |
| 23 | Yu et al. <sup>24</sup> ;<br>Luo et al. <sup>62</sup>                               |                 | 29 | None                      | Cesarean | NI                                                               | 40 <sup>+4</sup> | Live birth | No | 3500 | (8-9, 9-10) | None                                               | Not tested                                                          | Not tested                                    | Neonatal throat swab |
| 24 | Yu et al. <sup>24</sup> ;<br>Luo et al. <sup>62</sup>                               |                 | 34 | Uterine scar              | Cesarean | NI                                                               | 38 <sup>+2</sup> | Live birth | No | 3300 | (8-9, 9-10) | None                                               | Not tested                                                          | Not tested                                    | Neonatal throat swab |
| 25 | Yu et al. <sup>24</sup> ;<br>Liu et al. <sup>25</sup> ;<br>Luo et al. <sup>62</sup> |                 | 34 | Uterine scar              | Cesarean | NI                                                               | 38 <sup>+4</sup> | Live birth | No | 3250 | (8-9, 9-10) | None                                               | Newborn's throat swab                                               | Negative                                      | No                   |
| 26 | Zeng et al. <sup>29</sup>                                                           | Jan - Feb, 2020 | NI | None                      | Cesarean | Meconium-stained amniotic fluid and confirmed COVID-19 pneumonia | 40 <sup>+0</sup> | Live birth | No | 3250 | SI          | Lethargy, Fever. Radiologic diagnosis of pneumonia | Newborn's nasopharyngeal and anal swab (day 2, 4 and 6 after birth) | Positive on day 2 and 4 and negative on day 6 | No                   |

|                          |                                          |                                 |                                                                                                 |                                                                                               |                                         |                                                   |                                                   |            |    |                            |                |                                                                                                                                                            |                                                                                                  |                                                        |    |
|--------------------------|------------------------------------------|---------------------------------|-------------------------------------------------------------------------------------------------|-----------------------------------------------------------------------------------------------|-----------------------------------------|---------------------------------------------------|---------------------------------------------------|------------|----|----------------------------|----------------|------------------------------------------------------------------------------------------------------------------------------------------------------------|--------------------------------------------------------------------------------------------------|--------------------------------------------------------|----|
| 27                       | Zeng et al.<br>29                        |                                 | NI                                                                                              | None                                                                                          | Cesarean                                | COVID-19<br>Pneumonia                             | 40 <sup>+4</sup>                                  | Live birth | No | 3360                       | SI             | Lethargy,<br>vomiting, and<br>fever.<br>Radiologic<br>diagnosis of<br>pneumonia                                                                            | Newborn's<br>nasopharyngeal<br>and anal<br>swab (day 2, 4<br>and 6 after<br>birth)               | Positive on<br>day 2 and 4<br>and negative<br>on day 6 | No |
| 28                       | Zeng et al.<br>29                        |                                 | NI                                                                                              | PROM                                                                                          | Cesarean                                | Fetal<br>distress,<br>COVID-19<br>pneumonia       | 31 <sup>+2</sup>                                  | Live birth | No | 1580                       | (3,4)          | Asphyxia,<br>Pneumonia,<br>Respiratory<br>distress<br>syndrome,<br>shortness of<br>breath,<br>cyanosis.<br>Mechanical<br>ventilation                       | Newborn's<br>nasopharyngeal<br>and anal<br>swab (day 2, 4<br>and 7 after<br>birth)               | Positive on<br>day 2 and 4<br>and negative<br>on day 7 | No |
| 29-58<br>(n=30<br>cases) | Zeng et al.<br>29                        |                                 | NI                                                                                              | None                                                                                          | Vaginal<br>(n=7);<br>Cesarean<br>(n=23) | NI                                                | 3 Preterm<br>births                               | Live birth | No | SGA<br>(n=2)               | NI             | Asphyxia<br>(n=1);<br>Respiratory<br>distress<br>syndrome<br>(n=3);<br>shortness of<br>breath (n=3);<br>cyanosis<br>(n=2); feeding<br>intolerance<br>(n=2) | NI                                                                                               | Negatives<br>(n=30)                                    | No |
| 59-75<br>(n=17<br>cases) | Chen et al.<br>33,<br>Zhang et<br>al. 30 | 30 Jan -<br>23 Feb,<br>2020     | Epidural<br>anesthesia:<br>n=14 (mean<br>29,5);<br>general<br>anesthesia:<br>n=3 (mean<br>28,7) | Anemia<br>(n=5);<br>gestational<br>hypertension<br>(n=1);<br>gestational<br>diabetes<br>(n=2) | Cesarean<br>(n=17)                      | Fetal<br>distress<br>(n=3);<br>COVID-19<br>(n=14) | Preterm<br>births (n=3);<br>Term births<br>(n=14) | Live birth | NI | Normal<br>weight<br>(n=17) | (7-9,<br>9-10) | SI                                                                                                                                                         | Newborn's<br>oral swabs<br>(n=17) on day<br>1 after birth<br>and one day<br>before<br>discharge. | Negative<br>(n=17)                                     | No |
| 76                       | Liu et al.<br>31                         | 8 Dez,<br>2019 - 5<br>Feb, 2020 | 28                                                                                              | None                                                                                          | Pregnant<br>(GA 25 <sup>+0</sup> )      | NA                                                | NA                                                | NA         | No | NA                         | NA             | NA                                                                                                                                                         | NA                                                                                               | NA                                                     | No |
| 77                       | Liu et al.<br>31                         |                                 | 24                                                                                              | None                                                                                          | Pregnant<br>(GA 27 <sup>+0</sup> )      | NA                                                | NA                                                | NA         | NA | No                         | NA             | NA                                                                                                                                                         | NA                                                                                               | NA                                                     | NA |

|           |                                              |  |    |                |                                 |    |                                                            |            |                                   |    |    |                       |    |          |    |
|-----------|----------------------------------------------|--|----|----------------|---------------------------------|----|------------------------------------------------------------|------------|-----------------------------------|----|----|-----------------------|----|----------|----|
| <b>78</b> | Liu et al.<br>31                             |  | 33 | None           | Cesarean                        | NI | Preterm birth                                              | Live birth | No                                | NI | 10 | NI                    | NI | Negative | No |
| <b>79</b> | Liu et al.<br>31                             |  | 29 | None           | Pregnant (GA 33 <sup>+0</sup> ) | NA | NA                                                         | NA         | No                                | NA | NA | NA                    | NA | NA       | No |
| <b>80</b> | Liu et al.<br>31                             |  | 35 | PROM           | Cesarean                        | NI | Preterm birth (GA at hospital admission 34 <sup>+0</sup> ) | Live birth | No                                | NI | 10 | NI                    | NI | Negative | No |
| <b>81</b> | Liu et al. <sup>31</sup> ; Zhan et al.<br>63 |  | 31 | Fetal death    | Cesarean                        | NI | 35 <sup>+2</sup>                                           | Stillbirth | Yes (with mechanical ventilation) | NI | 0  | Intrauterine asphyxia | NI | Negative | No |
| <b>82</b> | Liu et al.<br>31                             |  | 30 | Fetal distress | Cesarean                        | NI | Preterm birth (GA at hospital admission 35 <sup>+0</sup> ) | Live birth | No                                | NI | 10 | NI                    | NI | Negative | No |
| <b>83</b> | Liu et al.<br>31                             |  | 36 | None           | Cesarean                        | NI | Preterm birth (GA at hospital admission 32 <sup>+5</sup> ) | Live birth | No                                | NI | 10 | NI                    | NI | Negative | No |
| <b>84</b> | Liu et al.<br>31                             |  | 26 | None           | Cesarean                        | NI | Preterm birth (GA at hospital admission 36 <sup>+0</sup> ) | Live birth | No                                | NI | 10 | NI                    | NI | Negative | No |
| <b>85</b> | Liu et al.<br>31                             |  | 32 | Fetal distress | Cesarean                        | NI | Preterm birth (GA at hospital admission 36 <sup>+4</sup> ) | Live birth | No                                | NI | 10 | NI                    | NI | Negative | No |
| <b>86</b> | Liu et al.<br>31                             |  | 30 | Fetal distress | Cesarean                        | NI | GA at hospital admission 37 <sup>+0</sup>                  | Live birth | No                                | NI | 10 | NI                    | NI | Negative | No |

|           |                          |              |    |                                                                               |                                   |                                                                             |                                              |            |    |      |        |    |                                                                                                                                                                                           |          |    |
|-----------|--------------------------|--------------|----|-------------------------------------------------------------------------------|-----------------------------------|-----------------------------------------------------------------------------|----------------------------------------------|------------|----|------|--------|----|-------------------------------------------------------------------------------------------------------------------------------------------------------------------------------------------|----------|----|
| <b>87</b> | Liu et al.<br>31         |              | 22 | None                                                                          | Cesarean                          | SI                                                                          | GA at hospital admission<br>38 <sup>+0</sup> | Live birth | No | NI   | 10     | NI | NI                                                                                                                                                                                        | Negative | No |
| <b>88</b> | Liu et al.<br>31         |              | 30 | None                                                                          | Cesarean                          | SI                                                                          | GA at hospital admission<br>38 <sup>+3</sup> | Live birth | No | NI   | 10     | NI | NI                                                                                                                                                                                        | Negative | No |
| <b>89</b> | Li et al. <sup>20</sup>  | 6 Feb, 2020  | 30 | NI                                                                            | Cesarean                          | Fetal distress                                                              | 35 <sup>+0</sup>                             | Live birth | No | NI   | NI     | NI | Placenta, amniotic fluid, cord blood, breast milk. Newborn's oropharyngeal swab at birth; oropharyngeal swab, blood, feces and urine samples until 2 days after birth (7 different times) | Negative | No |
| <b>90</b> | Xia et al. <sup>35</sup> | 20 Jan, 2020 | 27 | Reduced fetal movement, little amniotic fluid, possible intrauterine distress | Cesarean                          | Possible fetal distress and woman's clinical condition (COVID-19 pneumonia) | 37 <sup>+2</sup>                             | Live birth | NI | 3100 | (9,10) | NI | Newborn's oropharyngeal swab (day 3 and 5 after birth)                                                                                                                                    | Negative | No |
| <b>91</b> | Wen et al.<br>64         | 21 Jan, 2020 | 31 | None                                                                          | Pregnant (30 <sup>+0</sup> weeks) | NA                                                                          | NA                                           | NA         | No | NA   | NA     | NA | NA                                                                                                                                                                                        | NA       | NA |



|    |                   |                   |    |                      |          |                      |                  |            |    |      |         |                                                                                     |                                                                                                          |          |    |
|----|-------------------|-------------------|----|----------------------|----------|----------------------|------------------|------------|----|------|---------|-------------------------------------------------------------------------------------|----------------------------------------------------------------------------------------------------------|----------|----|
| 92 | Fan et al.<br>22  | 30 Jan, 2020      | 29 | None                 | Cesarean | Persistent fever     | 36 <sup>+5</sup> | Live birth | NI | 2890 | (9,10)  | Mild neonatal pneumonia and lymphopenia                                             | Placenta, cord blood, vaginal swab, amniotic fluid, breast milk. Newborn's nasopharyngeal swabs at birth | Negative | No |
| 93 | Fan et al.<br>22  | 31 Jan, 2020      | 34 | None                 | Cesarean | NI                   | 37 <sup>+0</sup> | Live birth | NI | 3400 | (9,10)  | Low-grade fever and abdominal distension with lymphopenia on day 3. Lung infection. | Placenta, cord blood, vaginal swab, amniotic fluid, breast milk. Newborn's nasopharyngeal swabs at birth | Negative | No |
| 94 | Chen et al.<br>32 | 23 - 27 Jan, 2020 | 29 | Gestational diabetes | Vaginal  | NA                   | 40 <sup>+4</sup> | Live birth | No | 3235 | (10,10) | None                                                                                | Newborn's oral swab                                                                                      | Negative | No |
| 95 | Chen et al.<br>32 |                   | 30 | Pre-eclampsia        | Cesarean | Fetal tachycardia    | 39 <sup>+1</sup> | Live birth | No | 3800 | (10,10) | None                                                                                | Newborn's oral swab                                                                                      | Negative | No |
| 96 | Chen et al.<br>32 |                   | 25 | None                 | Vaginal  | NA                   | 38 <sup>+6</sup> | Live birth | No | 3670 | (10,10) | None                                                                                | Newborn's oral swab                                                                                      | Negative | No |
| 97 | Chen et al.<br>32 |                   | 31 | None                 | Vaginal  | NA                   | 39 <sup>+6</sup> | Live birth | No | 3700 | (10,10) | None                                                                                | Newborn's oral swab                                                                                      | Negative | No |
| 98 | Chen et al.<br>32 |                   | 29 | Gestational diabetes | Cesarean | Diabetes gestational | 39 <sup>+0</sup> | Live birth | No | 4050 | (10,10) | None                                                                                | Newborn's oral swab                                                                                      | Negative | No |

|                       |                   |                      |                    |                                                                                         |                                                                |                |                                     |             |     |      |             |      |                                                                                                                                                                        |                                                                               |    |
|-----------------------|-------------------|----------------------|--------------------|-----------------------------------------------------------------------------------------|----------------------------------------------------------------|----------------|-------------------------------------|-------------|-----|------|-------------|------|------------------------------------------------------------------------------------------------------------------------------------------------------------------------|-------------------------------------------------------------------------------|----|
| <b>99</b>             | Wang et al.<br>19 | 2 Feb, 2020          | 28                 | Fetal distress                                                                          | Cesarean                                                       | Fetal distress | 30 <sup>+0</sup>                    | Live birth  | Yes | 1830 | (9,10)      | None | Placenta, amniotic fluid, cord blood, gastric juice at birth. Newborn's throat swab at birth and on days 3, 7 and 9 after birth. Newborn's stool on day 3 after birth. | Negative                                                                      | No |
| <b>100</b>            | Liao et al.<br>23 | 11 Feb, 2020         | 25                 | Fetal distress                                                                          | Cesarean                                                       | Fetal distress | 35 <sup>+3</sup>                    | Live birth  | No  | NI   | NI          | NI   | Placenta, amniotic fluid, cord blood, neonatal serum, neonatal throat swab and neonatal anal swab                                                                      | Negative                                                                      | NI |
| <b>101-141 (n=41)</b> | Liu et al.<br>34  | 27 Jan- 14 Feb, 2020 | Median:30 (22- 42) | Gestational diabetes (n=4); gestational hypertension (n=3); hepatitis B infection (n=1) | Pregnant (n=22); deliveries (n=19), type of birth not informed | NI             | 22 <sup>+0</sup> - 40 <sup>+5</sup> | Live births | No  | NI   | NI          | None | NI                                                                                                                                                                     | Negative (n=19)                                                               | No |
| <b>142-147 (n=6)</b>  | Zeng et al.<br>27 | 16 Feb - 6 Mar, 2020 | SI                 | NI                                                                                      | Cesarean (n=6)                                                 | NI             | NI                                  | Live births | NI  | SI   | (8-9, 9-10) | NI   | Neonatal blood and throat swab.                                                                                                                                        | Negative RT-PCR test results in blood and throat swab (n=6); High IgG and IgM | NI |

|     |                   |              |    |                                    |          |                                    |                  |            |    |                  |        |      |                                                                                       |                                                                                                                                                                                                          |    |
|-----|-------------------|--------------|----|------------------------------------|----------|------------------------------------|------------------|------------|----|------------------|--------|------|---------------------------------------------------------------------------------------|----------------------------------------------------------------------------------------------------------------------------------------------------------------------------------------------------------|----|
|     |                   |              |    |                                    |          |                                    |                  |            |    |                  |        |      |                                                                                       | concentrations (n=2); High IgG and normal IgM (n=3)                                                                                                                                                      |    |
| 148 | Dong et al.<br>28 | 22 Feb, 2020 | 29 | NI                                 | Cesarean | SI                                 | 37 <sup>+6</sup> | Live birth | NI | 3120             | (9,10) | NI   | Oral and vaginal swab, the mother's blood, breast milk. Newborn's oral swab and blood | Negative RT-PCR (breast milk; nasopharyngeal swabs in 5 samples collected between 2h after birth to day 16 after birth). Elevated levels of SARS-CoV-2 IgM and IgG (day of birth and day 15 after birth) | No |
| 149 | Chen et al.<br>26 | 29 Jan, 2020 | 23 | Placenta previa                    | Cesarean | Placenta previa                    | 37 <sup>+4</sup> | Live birth | No | NI               | NI     | None | Placenta, newborn's throat swab                                                       | Negative                                                                                                                                                                                                 | No |
| 150 | Chen et al.<br>26 | 22 Jan, 2020 | 34 | Cholecystitis; placental abruption | Cesarean | Cholecystitis; placental abruption | 39 <sup>+0</sup> | Live birth | No | NI               | NI     | None | Placenta, newborn's throat swab                                                       | Negative                                                                                                                                                                                                 | No |
| 151 | Chen et al.<br>26 | 4 Feb, 2020  | 32 | Placenta previa                    | Cesarean | Placenta previa                    | 35 <sup>+0</sup> | Live birth | No | Low birth weight | NI     | None | Placenta, newborn's throat swab                                                       | Negative                                                                                                                                                                                                 | No |

|     |                       |                            |    |                                             |          |                                                                      |                  |            |     |      |        |                                         |                                                                                                                                                     |          |    |
|-----|-----------------------|----------------------------|----|---------------------------------------------|----------|----------------------------------------------------------------------|------------------|------------|-----|------|--------|-----------------------------------------|-----------------------------------------------------------------------------------------------------------------------------------------------------|----------|----|
| 152 | Lee et al.<br>13      | 6 Mar, 2020                | 28 | None                                        | Cesarean | Cephalopelvic disproportion                                          | 37 <sup>+6</sup> | Live birth | No  | 3130 | (9,10) | None                                    | Placenta, amniotic fluid, cord blood and two newborn's nasopharyngeal swab                                                                          | Negative | No |
| 153 | Zambrano et al.<br>14 | 19 Mar, 2020               | 41 | Gestational hypertension and hypothyroidism | Vaginal  | NA                                                                   | 32 <sup>+0</sup> | Live birth | No  | 1500 | NI     | Dysplastic and multicystic right kidney | Newborn's nasopharyngeal swab and blood sample                                                                                                      | Negative | No |
| 154 | Iqbal et al.<br>11    | Published on 1 April, 2020 | 34 | None                                        | Vaginal  | NA                                                                   | 39 <sup>+3</sup> | Live birth | No  | NI   | (8,9)  | None                                    | Amniotic fluid, vaginal side walls, and rectum. Newborn's swabs: nasopharynx, oropharynx, oral mucosa, skin surface and rectum right after delivery | Negative | No |
| 155 | Kalafat et al.<br>15  | 25 March, 2020             | 32 | Thalassemia trait                           | Cesarean | COVID-19; reduced tidal volume from the increased abdominal pressure | 36 <sup>+1</sup> | Live birth | Yes | 2790 | (SI,9) | None                                    | Placenta, cord blood, newborn's throat and nasal swabs, breast milk                                                                                 | Negative | No |

|                             |                     |                            |                   |                                                                                                                                                                                                                                                                         |                                  |                    |                                        |                                      |    |                                              |                                |                               |                                                                                                                                  |                |    |
|-----------------------------|---------------------|----------------------------|-------------------|-------------------------------------------------------------------------------------------------------------------------------------------------------------------------------------------------------------------------------------------------------------------------|----------------------------------|--------------------|----------------------------------------|--------------------------------------|----|----------------------------------------------|--------------------------------|-------------------------------|----------------------------------------------------------------------------------------------------------------------------------|----------------|----|
| <b>156</b>                  | Gidlöf et al.<br>16 | Published on 6 April, 2020 | 34                | Preeclampsia, gestational diabetes, dichorionic twin pregnancy                                                                                                                                                                                                          | Cesarean                         | NI                 | 36 <sup>+2</sup>                       | Live birth (n=2)                     | No | Twin1: 2680; Twin2: 2160                     | Twin 1: (9,10); Twin 2: (9,10) | Twin1-gastrointestinal reflux | Newborn's Nasopharyngeal swab (34 hours and 4 days after birth); breast milk and maternal vaginal secretion (5 days after birth) | Negative       | No |
| <b>157-190 (n=34 cases)</b> | Li et al.<br>36     | 24 Jan-29 Feb, 2020        | Mean: 30.9 (±3.2) | Cases confirmed by RT-PCR positive for SARS-CoV-2 (n=16); chronic hypertension (n=1); polycystic ovary syndrome (n=1); gestational diabetes (n=3); PROM (n=1); gestational hypertension (n=3); hypothyroidism (n=2); preeclampsia (n=1); sinus tachycardia (n=1); fetal | Cesarean (n=14)<br>Vaginal (n=2) | COVID-19 Pneumonia | Mean: 38 ± 0.2<br>3 preterm deliveries | Live births (n=17; 1 twin pregnancy) | No | Mean: 3066.7±560.2<br>Low birth weight (n=3) | Mean: (9.6±0.5;10.0±0.0)       | None                          | Newborn's throat swabs (one 4 days and another 14 days after birth) (n=3)                                                        | Negative (n=3) | No |

|                             |                              |                     |                   |                                                                                                                                                      |                                                    |                   |                                                    |                                      |                               |                                                |                               |      |                          |          |    |
|-----------------------------|------------------------------|---------------------|-------------------|------------------------------------------------------------------------------------------------------------------------------------------------------|----------------------------------------------------|-------------------|----------------------------------------------------|--------------------------------------|-------------------------------|------------------------------------------------|-------------------------------|------|--------------------------|----------|----|
|                             |                              |                     |                   | distress (n=2)                                                                                                                                       |                                                    |                   |                                                    |                                      |                               |                                                |                               |      |                          |          |    |
|                             |                              |                     | Mean: 29.8 (±2.3) | Cases with typical chest CT imaging (n=18); gestational hypertension (n=2); fetal distress (n=1)                                                     | Cesarean (n=16)<br>Vaginal (n=2)                   | NI                | Mean: 38 ± 2.9<br>3 preterm deliveries             | Live births (n=19; 1 twin pregnancy) | No                            | Mean: 3198.7 ± 522.6<br>Low birth weight (n=2) | Mean: (9.6 ± 0.5; 10.0 ± 0.0) | None | SI                       | Negative | No |
| <b>191-205 (n=15 cases)</b> | Liu et al. <sup>17</sup>     | 20 Jan-10 Feb, 2020 | 23-40             | Thalassemia and gestational diabetes (n=1); previous mitral and tricuspid valves replacement (n=1); placenta previa (n=1); COVID-19 Pneumonia (n=15) | Cesarean (n=10)<br>Vaginal (n=1)<br>Pregnant (n=4) | NI                | GA at admission: 12-38<br>Preterm deliveries (n=3) | Live births (n=11)                   | No                            | NI                                             | (8;9)                         | None | NI                       | Negative | No |
| <b>206</b>                  | Breslin et al. <sup>12</sup> | 25 Mar, 2020        | 38                | Diabetes type 2; intrahepatic                                                                                                                        | Cesarean                                           | Arrest of descent | 37 <sup>+0</sup>                                   | Live birth                           | Yes (endotracheal intubation) | NI                                             | NI                            | None | Neonatal sample at day 1 | Negative | No |
| <b>207</b>                  | Breslin et al. <sup>12</sup> |                     | 33                | Diabetes type 2; chronic hypertension; asthma                                                                                                        | Cesarean                                           | Failed induction  | 37 <sup>+5</sup>                                   | Live birth                           | Yes                           | NI                                             | NI                            | None | Neonatal sample at day   | Negative | No |

|     |                              |  |    |        |    |    |                  |            |    |    |    |    |    |    |    |
|-----|------------------------------|--|----|--------|----|----|------------------|------------|----|----|----|----|----|----|----|
| 208 | Breslin et al. <sup>12</sup> |  | 30 | None   | NI | NI | 35 <sup>+5</sup> | Live birth | No | NI | NI | NI | NI | NI | NI |
| 209 | Breslin et al. <sup>12</sup> |  | 32 | None   | NI | NI | 32 <sup>+5</sup> | Live birth | No | NI | NI | NI | NI | NI | NI |
| 210 | Breslin et al. <sup>12</sup> |  | 27 | None   | NI | NI | 26 <sup>+3</sup> | Live birth | No | NI | NI | NI | NI | NI | NI |
| 211 | Breslin et al. <sup>12</sup> |  | 38 | Asthma | NI | NI | 28 <sup>+0</sup> | Live birth | No | NI | NI | NI | NI | NI | NI |
| 212 | Breslin et al. <sup>12</sup> |  | 39 | None   | NI | NI | 34 <sup>+6</sup> | Live birth | No | NI | NI | NI | NI | NI | NI |

**Abbreviations:**

BGA – Big for Gestational Age; GA – Gestational age; NA – Not Applicable; SGA – Small for Gestational Age; PROM – Premature Rupture of Membranes; RT-PCR – Real-time reverse Transcriptase–Polymerase Chain Reaction; NI – No information.
